# Supplementary material for: Weekday-Weekend Sedentary Behavior and Recreational Screen Time Patterns in Families with Preschoolers, Schoolchildren, and Adolescents: Cross-Sectional Three Cohort Study
Source: MDPI journal article supplement (doi:10.3390/ijerph18094532), 2021-04-24

**Scheme S1.** Study flowchart of participants.

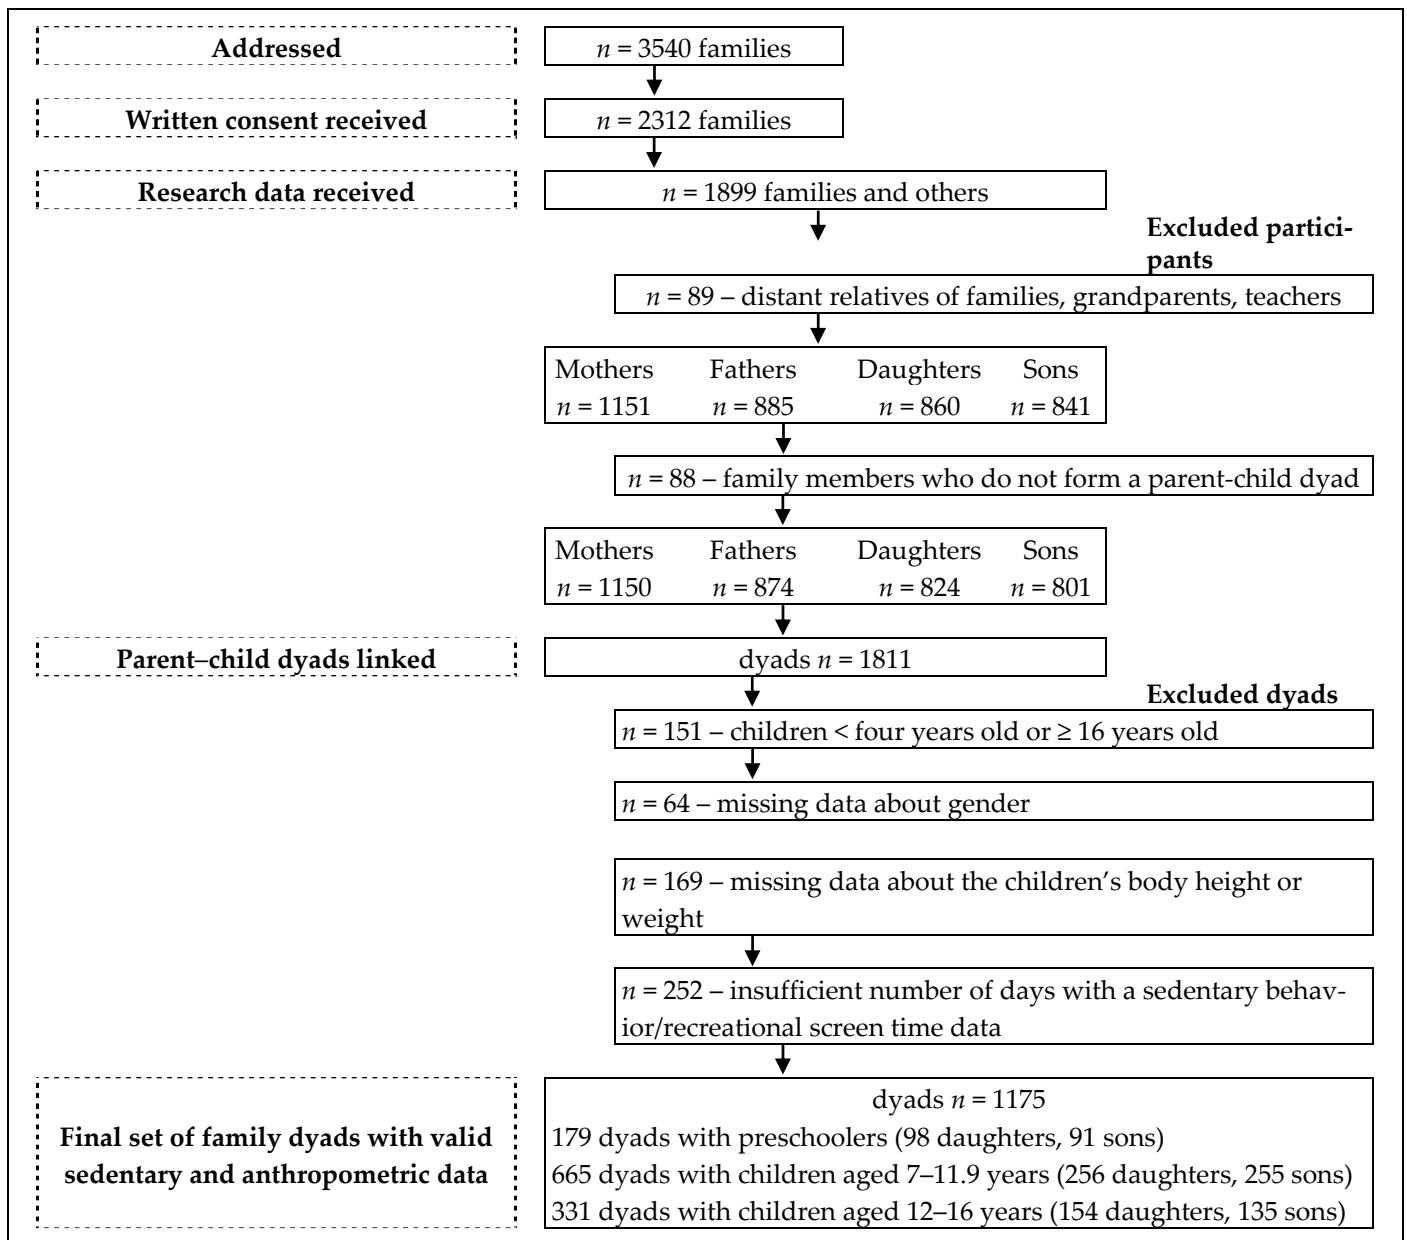

Supplement: s1 [file s1]
